# Supplementary material for: Structure-dependent mechanical properties of self-folded two-dimensional nanomaterials
Source: Royal Society of Chemistry journal article supplement (doi:10.1039/d2cp00508e), 2022-01-01
Supplement: d2cp00508e1.pdf [file d2cp00508e1.pdf]

*Supplementary material*

## Structure-dependent mechanical properties of self-folded two-dimensional nanomaterials

Anran Wei <sup>a</sup>, Han Ye <sup>b</sup>, Fenglin Guo <sup>a\*</sup>

<sup>a</sup> School of Naval Architecture, Ocean and Civil Engineering (State Key Laboratory of Ocean Engineering), Shanghai Jiao Tong University, Shanghai 200240, China

<sup>b</sup> State Key Laboratory of Information Photonics and Optical Communications, Beijing University of Posts and Telecommunications, Beijing 100876, China

\* Corresponding author, E-mail: [flguo@sjtu.edu.cn](mailto:flguo@sjtu.edu.cn)

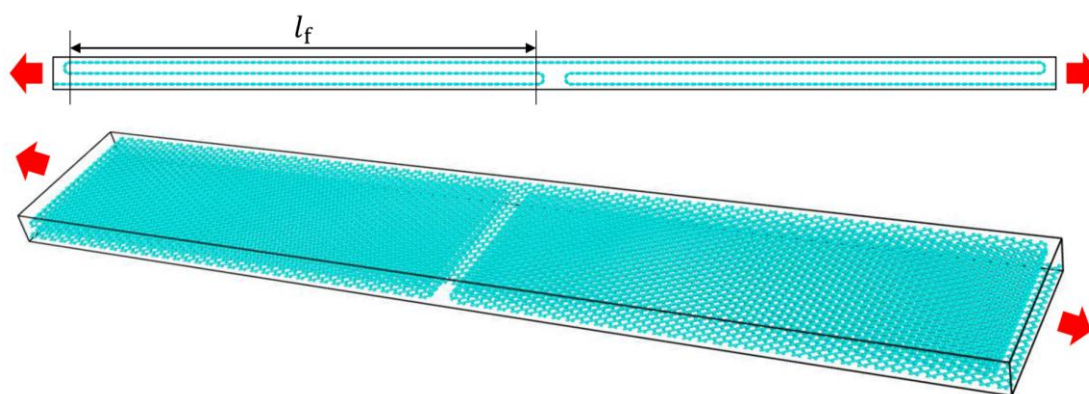

**Fig. S1 Atomistic model of MD simulation for uniaxial tension of self-folded graphene.**

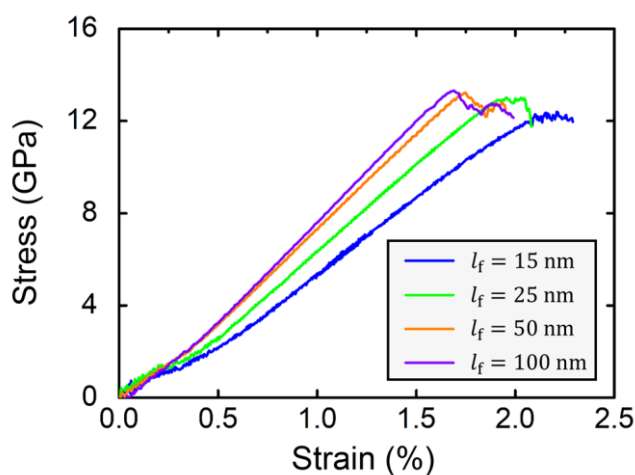

**Fig. S2 Stress-strain curves obtained from MD simulations for self-folded graphene under uniaxial tension.**

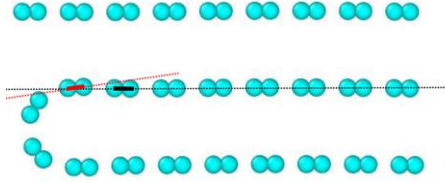

**Fig. S3** Local observation of the atomistic model of MD simulation after equilibrium.

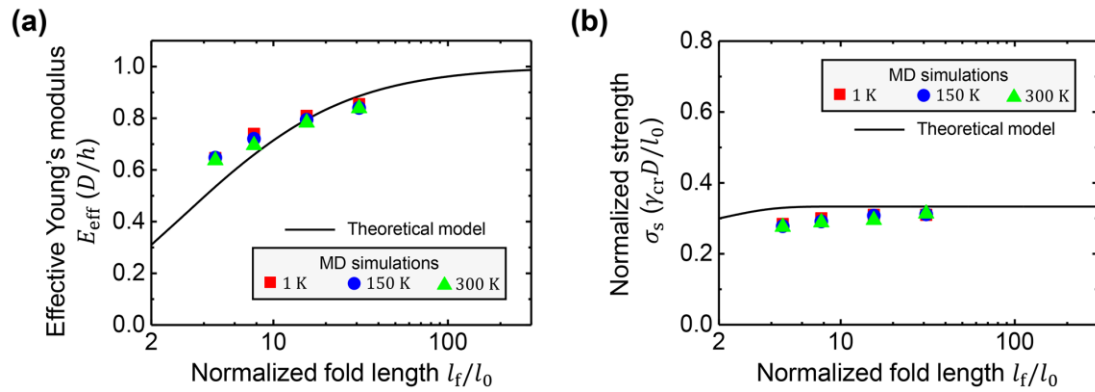

**Fig. S4** Effects of temperature on the agreement between the theoretical model and MD simulations. The (a) Young's modulus and (b) strength with different temperature as 1 K, 150 K and 300 K.

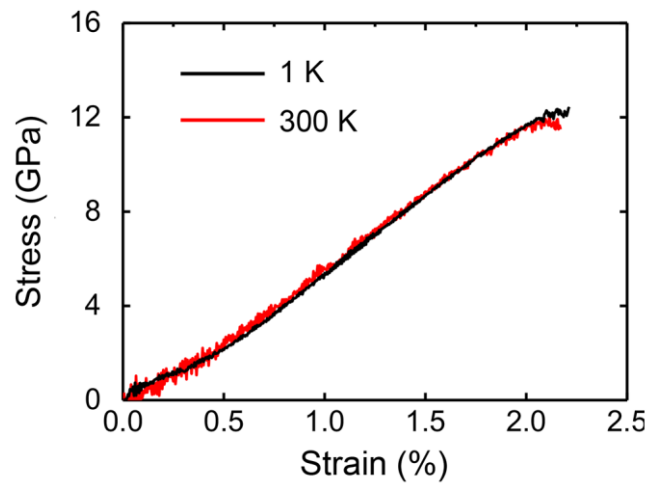

**Fig. S5** Comparison of stress-strain curves for simulations under 1 K and 300 K.

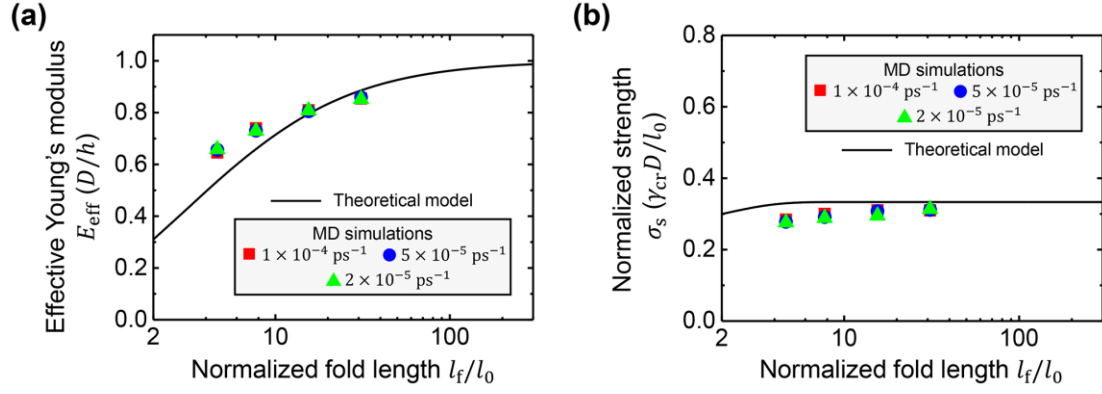

**Fig. S6 Effects of strain rate on the agreement between the theoretical model and MD simulations.** The (a) Young's modulus and (b) strength with different strain rates as  $1 \times 10^{-4} \text{ ps}^{-1}$ ,  $5 \times 10^{-5} \text{ ps}^{-1}$  and  $2 \times 10^{-5} \text{ ps}^{-1}$ .

**Table. S1 Original results of Young's modulus obtained from MD simulations.**

|                        | Group 1 | Group 2 | Group 3 | Mean    | Standard Deviation | Coefficient of variation |
|------------------------|---------|---------|---------|---------|--------------------|--------------------------|
| $l_f = 15 \text{ nm}$  | 662 GPa | 670 GPa | 668 GPa | 667 GPa | 4.16 GPa           | 0.624 %                  |
| $l_f = 25 \text{ nm}$  | 758 GPa | 752 GPa | 750 GPa | 753 GPa | 4.16 GPa           | 0.553 %                  |
| $l_f = 50 \text{ nm}$  | 829 GPa | 822 GPa | 824 GPa | 825 GPa | 3.61 GPa           | 0.437 %                  |
| $l_f = 100 \text{ nm}$ | 876 GPa | 879 GPa | 879 GPa | 878 GPa | 1.73 GPa           | 0.197 %                  |

**Table. S2 Original results of tensile strength obtained from MD simulations.**

|                        | Group 1  | Group 2  | Group 3  | Mean     | Standard Deviation | Coefficient of variation |
|------------------------|----------|----------|----------|----------|--------------------|--------------------------|
| $l_f = 15 \text{ nm}$  | 11.8 GPa | 12.3 GPa | 12.1 GPa | 12.1 GPa | 0.262 GPa          | 2.17 %                   |
| $l_f = 25 \text{ nm}$  | 12.5 GPa | 12.9 GPa | 13.0 GPa | 12.8 GPa | 0.307 GPa          | 2.40 %                   |
| $l_f = 50 \text{ nm}$  | 12.9 GPa | 13.4 GPa | 13.5 GPa | 13.2 GPa | 0.329 GPa          | 2.48 %                   |
| $l_f = 100 \text{ nm}$ | 12.9 GPa | 13.7 GPa | 13.9 GPa | 13.5 GPa | 0.551 GPa          | 4.09 %                   |
